1  
2  
3  
4  
5  
6  
7  
8  
9  
10  
11  
12  
13  
14  
15  
16  
17  
18  
19  
20  
21  
22  
23  
24  
25  
26  
27  
28  
29  
30  
31  
32  
33  
34  
35  
36  
37  
38  
39  
40  
41  
42  
43  
44  
45  
46  
47  
48

**Bystander intervention is associated with reduced mortality among injury victims in Cameroon**

Kathleen O'Connor BS<sup>1</sup>, Matthew Driban BS<sup>1</sup>, Rasheedat Oke MD MPH<sup>2</sup>, Fanny Nadia Dissak-Delon, MD PhD MPH<sup>2</sup>, Signe Mary Magdalene Tanjong, MPH<sup>3</sup>, Tchekep Mirene RN<sup>4</sup>, Mbeya Dieudonne RN<sup>3</sup>, Thompson Kinge MD<sup>3</sup>, Richard L. Njock MD<sup>6</sup>, Daniel N. Nkusu MD<sup>5</sup>, Jean-Gustave Tsiagadigui MD<sup>4</sup>, Cyrille Edouka RN<sup>6</sup>, Catherine Wonja RN<sup>6</sup>, Zachary Eisner BS<sup>7</sup>, Peter Delaney MD<sup>8</sup>, Catherine Julliard MD MPH<sup>2</sup>, Alain Chichom-Mefire MD<sup>9</sup>, S. Ariane Christie MD<sup>2</sup>

<sup>1</sup>University of Pittsburgh School of Medicine, Pittsburgh, PA, USA

<sup>2</sup>Program for the Advancement of Surgical Equity (PASE), Department of Surgery, University of California Los Angeles, Los Angeles, CA, USA

<sup>3</sup>Limbe Regional Hospital, Limbe, Cameroon

<sup>4</sup>Edea Regional Hospital, Edea, Cameroon

<sup>5</sup>Catholic Hospital of Pouma, Pouma, Cameroon

<sup>6</sup>Hopital Laquintinie de Douala, Douala, Cameroon

<sup>7</sup>University of Michigan School of Medicine, Ann Arbor, Michigan, USA

<sup>8</sup>Department of Orthopaedic Surgery, Cleveland Clinic, Cleveland, OH, USA

<sup>9</sup>Department of Surgery, Faculty of Health Sciences, University of Buea Faculty of Health Sciences, Buea, Cameroon

49 ABSTRACT

50

51 Introduction

52

53 Despite high injury mortality rates, Cameroon currently lacks a formal prehospital care system. In  
54 other sub-Saharan African low and middle-income countries, Lay First Responder (LFR) programs  
55 have trained non-medical professionals with high work-related exposure to injury in principles of  
56 basic trauma care. To develop a context-appropriate LFR program in Cameroon, we used trauma  
57 registry data to understand current layperson bystander involvement in prehospital care and explore  
58 associations between current non-formally trained bystander-provided prehospital care and clinical  
59 outcomes.

60

61 Methods

62

63 The Cameroon Trauma Registry (CTR) is a longitudinal, prospective, multisite trauma registry  
64 cohort capturing data on injured patients presenting to four hospitals in Cameroon. We assessed  
65 prevalence and patterns of prehospital scene care among all patients enrolled in a prospective,  
66 multisite trauma registry (Cameroon Trauma Registry (CTR)) in 2020. Associations between scene  
67 care, clinical status at presentation, and outcomes were tested using univariate and multivariate  
68 logistic regression. Injury severity was measured using the abbreviated injury score. Data were  
69 analyzed using Stata17.

70

71 Results

72 Of 2212 injured patients, 455 (21%) received prehospital care (PC) and 1699 (77%) did not receive  
73 care (NPC). Over 90% (424) of prehospital care was provided by persons without formal medical  
74 training. The most common prehospital interventions performed included bleeding control (370,  
75 57%) and fracture immobilization (139, 21%). PC patients were more severely injured ( $p<0.001$ ),  
76 had markers of increased socioeconomic status ( $p=0.01$ ), and longer transport distances ( $p<0.001$ )  
77 compared to NPC patients. Despite increased severity of injury, patients who received PC were  
78 more likely to present with a palpable pulse ( $OR=6.2$ ,  $p=0.02$ ). Multivariate logistic regression  
79 adjusted for injury severity, socioeconomic status and travel distance found PC to be associated with  
80 reduced emergency department mortality ( $OR=0.14$ ,  $p<0.0001$ ).

81

82 Conclusions

83

84 Although prehospital injury care in Cameroon is rarely performed and is provided almost entirely by  
85 persons without formal medical training, prehospital intervention is associated with increased early  
86 survival after injury. Implementation of LFR training to strengthen the frequency and quality of  
87 prehospital care has considerable potential to improve trauma survival. LFR training in Cameroon  
88 should target commercial drivers given high work-related exposure to the injured and emphasize  
89 bleeding control interventions.

90

91

## 92 INTRODUCTION

93

94 Low- and middle-income countries (LMICs) bear 90% of the world's mortality burden due to injury.

95 <sup>1</sup> Prehospital care is a critical component of the survival chain following injury, but prehospital care  
96 availability is extremely limited in LMICs. Trauma system development and quality improvement  
97 remain ongoing priorities in LMICs, with interest in prehospital care systems increasing as evidence  
98 emerges that basic prehospital life support measures may be equally effective as advanced  
99 interventions. <sup>2</sup> In May 2023, the 76th World Health Assembly (WHA) resolved that emergency,  
100 critical and operative care services are an integral part of a comprehensive national primary health  
101 care approach and foundational for health systems to effectively address emergencies. <sup>3</sup> Trauma  
102 system implementation may potentially address 54% of all-cause mortality across LMICs with  
103 integrated prehospital and inpatient emergency care. <sup>2,4,5</sup>

104

105 The World Health Organization (WHO) affirms that prehospital care is a crucial component of  
106 mature trauma systems. In settings without existing prehospital infrastructure, the WHO has  
107 recommended training bystanders as Lay First Responders (LFRs) as the first step toward  
108 prehospital infrastructure development. <sup>6</sup> LFR programs have since emerged to train non-medical  
109 professionals with high work-related exposure to injury in basic principles of trauma prehospital  
110 care. Such trainee populations have included mototaxi drivers, taxi drivers, police officers, and  
111 firefighters. <sup>7-9</sup> Implementation of LFR programs may reduce 45% of all-cause mortality across  
112 LMIC. <sup>4</sup> Among LFR programs piloted across multiple sub-Saharan African countries, evaluations  
113 have been restricted to LFR educational outcomes, program cost effectiveness, and prehospital  
114 patient analyses without longitudinal clinical outcomes due to the lack of prospective data following  
115 LFR implementation. <sup>8,10-12</sup> Without longitudinal clinical data to measure patient outcomes following  
116 prehospital LFR care, evaluation of LFR program efficacy has been limited.

117

118 In 2015, we developed the Cameroon Trauma Registry (CTR), a prospective, ongoing, multisite  
119 trauma registry that has since collected data on over 30,000 patients across four medical centers:  
120 Laquintinie Hospital, Regional Hospital of Limbe, Catholic Hospital of Pouma, and Regional  
121 Hospital of Edea. <sup>12</sup> The registry collects clinical data including demographics, injury characteristics,  
122 prehospital care, injury severity, vital signs, and clinical outcomes. This data provides powerful  
123 insight into the landscape of prehospital care as it currently stands in Cameroon to drive evidence-  
124 based investment in health programs. Having now developed a robust trauma registry, we are  
125 uniquely positioned to study the clinical impact of LFR program implementation to determine its  
126 appropriateness as the first step toward formal trauma system development. In this study, we aim to  
127 characterize existing deficits in prehospital care in Cameroon to determine the appropriateness of  
128 LFR program implementation, determine a target LFR trainee population, and identify potential  
129 interventions to prioritize to inform curriculum development.

130

## 131 METHODS

### 132 *Study setting*

133

134 Cameroon is a Central African nation with a population over twenty-seven million and no  
135 established prehospital care system. Ambulance access is concentrated in its largest cities and use is  
136 generally limited to patient transport rather than emergency response. <sup>6</sup> The current practices for  
137 bringing injury victims to the hospital in the absence of formal prehospital infrastructure is  
138 unexplored in Cameroon.

139

140 *Cameroon Trauma Registry*

141 We extracted data from a prospective multicenter cohort study of trauma patients (the Cameroon  
142 Trauma Registry (CTR)). At time of analysis in May 2023, data had been collected from four  
143 hospitals with diverse patient populations: Laquintinie Hospital, Regional Hospital of Limbe,  
144 Catholic Hospital of Pouma, and Regional Hospital of Edea. The database contains patients from  
145 January 2020 to December 2022. Inclusion criteria include patients of all ages presenting to the  
146 hospital for injuries who were admitted to the hospital, died in the emergency department, left  
147 against medical advice, or were transferred to another hospital. Patients were excluded if they were  
148 discharged directly from the emergency department. Patients enrolled in the registry following verbal  
149 consent were followed from hospital admission to discharge.

150  
151 Data extracted from the CTR included demographics, injury characteristics including injury severity,  
152 clinical patterns, treatments, and outcomes. Patients who received prehospital care (PC) were  
153 compared to patients who did not receive prehospital care (NPC). Prehospital care was defined as  
154 informal medical intervention prior to presentation to a CTR center. The prehospital interventions  
155 assessed were bleeding control (including compression and elevation), fracture immobilization,  
156 tourniquet placement, C-spine immobilization, topical burn treatment, backboard support, CPR,  
157 assistance to the recovery position, and IV fluids. Data extracted from the CTR included  
158 demographics, injury characteristics including injury severity, clinical patterns, treatments, and  
159 outcomes. Patients who received prehospital care (PC) were compared to patients who did not  
160 receive prehospital care (NPC). Individuals who administered prehospital care were self-identified  
161 upon hospital presentation and included bystanders, individuals involved in the accident,  
162 family/friends, and those with informal medical training (police, military).

163

164 *Ethics statement*

165 The University of California Los Angeles and Cameroonian Ministry of Public Health manage the  
166 CTR and ongoing ethical approval for the CTR is maintained at both institutions. Prior to  
167 enrollment in the CTR, local research assistants secured informed consents from patients or  
168 surrogates using an IRB-approved script. Research assistants encouraged patients and surrogates to  
169 ask questions. Participation in the CTR is completely voluntary and had no effect on medical care.  
170 Verbal consent was utilized given low risk for participation and variable literacy. Patients are  
171 excluded from CTR enrollment if they do not consent to participate. Patient information was de-  
172 identified at time of analysis.

173

174 *Data Analysis*

175 Data were summarized using means and standard deviation for normally distributed numeric  
176 variables and by medians and interquartile ranges for nonparametric numeric variables. using the  
177 Shapiro-Wilk test. Frequencies and proportions were reported for categorical variables.  
178 Comparisons between groups were made using Chi squared (no tail) for categorical variables and  
179 Kruskal-Wallis analysis for numerical variables. We evaluated associations between prehospital care  
180 and patient outcomes using logistic regression. For all analysis, alpha level of 0.05 was used for  
181 significance. Statistical analysis was conducted in Stata 17.

182

183 RESULTS

184

185 In 2020, 2212 patients were enrolled in the CTR. The majority (1300, 76%) of injured patients were  
186 male and the median age was 31 (IQR 24,42). Overall, 88% (2033) lived in urban areas and 95%

187 (2087) had family access to a cellphone. Road traffic injuries were most common injury mechanism  
 188 (1580, 74%) and patients most often presented to the hospital setting with closed fractures (479,  
 189 22%), hematomas (340, 16%), and deep lacerations (334, 15%). The median travel distance to the  
 190 hospital following injury was 10 km (IQR 5,13). (Table 1)  
 191

|                        |                            | NPC          |      | PC          |      | P     |
|------------------------|----------------------------|--------------|------|-------------|------|-------|
|                        |                            | Freq.        | %    | Freq        | %    |       |
| <b>Sex</b>             | Male                       | 1300         | 77   | 349         | 20.6 | 0.95  |
| <b>Age (IQR)</b>       |                            | 32 (24, 42)  |      | 31 (25, 43) |      | <0.01 |
| <b>Urban/Rural</b>     | Rural                      | 119          | 44.7 | 143         | 53.8 | <0.01 |
|                        | Urban                      | 1570         | 81.4 | 310         | 16.1 |       |
| <b>Cellphone</b>       | No                         | 77           | 4.5  | 37          | 8.1  | <0.01 |
|                        | Yes                        | 1616         | 95.1 | 417         | 91.6 |       |
| <b>LPG*</b>            | No                         | 864          | 50.6 | 201         | 49.2 | <0.01 |
|                        | Yes                        | 835          | 44.2 | 254         | 55.8 |       |
| <b>Travel (km) IQR</b> |                            | 10 (5, 12.3) |      | 10 (5, 18)  |      | <0.01 |
| <b>Injury mech</b>     | RTI                        | 1269         | 78.2 | 311         | 19.2 | <0.01 |
|                        | Stab/cut                   | 131          | 67.2 | 59          | 30.3 |       |
|                        | Fall                       | 143          | 86.1 | 19          | 11.5 |       |
|                        | Struck by person or object | 85           | 81   | 17          | 16.2 |       |
|                        | Other                      | 25           | 73.5 | 9           | 26.3 |       |
|                        | Gun                        | 10           | 38.5 | 15          | 57.7 |       |
|                        | Scald                      | 3            | 27.3 | 8           | 73.7 |       |
|                        | Burn                       | 5            | 55.6 | 4           | 44.4 |       |
| <b>Injury type</b>     | Closed frac                | 399          | 83.3 | 80          | 16.7 | <0.01 |
|                        | Hematoma                   | 329          | 96.8 | 11          | 3.2  |       |
|                        | Deep lac                   | 240          | 71.9 | 94          | 28.1 |       |
|                        | Open frac                  | 220          | 82.1 | 48          | 17.9 |       |
|                        | Superficial lac            | 125          | 61.9 | 77          | 38.1 |       |
|                        | Stab                       | 74           | 77.9 | 21          | 22.1 |       |
|                        | Bruise                     | 68           | 93.1 | 5           | 6.9  |       |
|                        | Degloving                  | 50           | 72.5 | 19          | 27.5 |       |
|                        | Sprain                     | 36           | 97.3 | 36          | 2.7  |       |
| <b>Injury location</b> | Extremities                | 555          | 83.8 | 107         | 16.2 | <0.01 |
|                        | Face                       | 246          | 93.2 | 18          | 6.8  |       |
|                        | Head/neck                  | 519          | 91.9 | 46          | 8.1  |       |
|                        | Chest                      | 136          | 48.6 | 144         | 51.4 |       |
|                        | Abdomen                    | 82           | 70.7 | 34          | 29.3 |       |
|                        | Pelvis                     | 61           | 60.4 | 40          | 39.6 |       |
|                        | Spine                      | 50           | 52.1 | 46          | 47.9 |       |
| <b>Injury severity</b> | Missing score              | 23           | 60.5 | 15          | 39.5 | <0.01 |
|                        | Minor                      | 24           | 96   | 1           | 4    |       |
|                        | Moderate                   | 534          | 93.7 | 25          | 4.4  |       |
|                        | Serious                    | 957          | 77.2 | 250         | 20.2 |       |
|                        | Severe                     | 124          | 43.4 | 152         | 53.2 |       |

|                       |              |      |      |     |      |       |
|-----------------------|--------------|------|------|-----|------|-------|
|                       | Critical     | 21   | 65.6 | 10  | 31.3 |       |
|                       | Unsurvivable | 16   | 88.9 | 2   | 11.1 |       |
| <b>Transport type</b> | Taxi         | 1061 | 94.7 | 60  | 5.3  | <0.01 |
|                       | Private car  | 208  | 53.5 | 181 | 46.5 |       |
|                       | Mototaxi     | 233  | 68.9 | 105 | 31.1 |       |
|                       | Other        | 54   | 44.7 | 67  | 55.3 |       |
|                       | Police       | 90   | 95.7 | 4   | 4.3  |       |
|                       | Ambulance    | 36   | 78.3 | 10  | 21.7 |       |
|                       | Walk         | 14   | 33.3 | 28  | 66.7 |       |
|                       | Unknown      | 3    | 100  | 0   | 0    |       |

192 Table 1: Demographics of trauma patients and prehospital care

193 \* LPG = liquid petroleum gas, marker for socioeconomic status; all categorical variables reported as  
 194 proportions and all numerical variables reported as medians with interquartile range

195

196

197 *Prehospital Care and Transport Patterns*

198

199 Overall, 459 (20%) received and 1699 (76%) did not receive prehospital care. The vast majority (424,  
 200 93%) of prehospital care was provided by persons without formal training. Specifically, bystanders  
 201 provided prehospital care for 70% (305), followed by relatives or friends (101, 23%) others involved  
 202 in the accident (9, 2%), and those who self-identify as having medical training (9, 2%). The most  
 203 common prehospital care interventions performed included bleeding control (370, 57%), fracture  
 204 immobilization (139, 21%), and tourniquet placement (78, 12%). (Table 2)

205

|                             |                         | Freq. | %    |
|-----------------------------|-------------------------|-------|------|
| <b>Provider description</b> | Bystander               | 305   | 70.4 |
|                             | Relative/friend         | 101   | 23.3 |
|                             | Person involved         | 9     | 2.07 |
|                             | Medic                   | 9     | 2.07 |
|                             | Other                   | 7     | 1.6  |
|                             | Police                  | 1     | 0.2  |
|                             | Unknown                 | 1     | 0.2  |
|                             | Driver                  | 0     | 0    |
|                             |                         |       |      |
| <b>Care provided</b>        | Control bleeding        | 370   | 56.7 |
|                             | Fracture immobilization | 139   | 21.3 |
|                             | Tourniquet placement    | 78    | 11.9 |
|                             | C-spine immobilization  | 37    | 5.6  |
|                             | Topical burn treatment  | 12    | 1.8  |
|                             | Back board              | 11    | 1.7  |
|                             | Other                   | 4     | 0.6  |
|                             | CPR                     | 1     | 0.15 |
|                             | Recovery position       | 1     | 0.15 |
|                             | Unknown                 | 1     | 0.15 |
|                             |                         |       |      |

|           |   |   |
|-----------|---|---|
| IV fluids | 0 | 0 |
|-----------|---|---|

206 Table 2: Classification of prehospital care providers and type of care  
 207 provided  
 208

209 The most common means of transporting patients to the hospital was commercial vehicles including  
 210 52% by taxi (1152) and 15% by motorcycle taxi (339). Only 3% (57) were brought to the hospital by  
 211 ambulance. (Table 1)  
 212

213 *Characteristics of prehospital care recipients*  
 214

215 There were no significant differences in sex or age between PC and NPC. PC patients were more  
 216 frequently from rural areas (54% vs. 45%  $p < 0.0001$ ) and did not have access to cellphones (91% vs.  
 217 95%  $p = 0.003$ ) but were users of Liquid Petroleum gas (55% vs. 44%,  $p = 0.003$ ), a proxy of  
 218 increased socioeconomic status. PC patients reported greater travel distance to the hospital NPC  
 219 15km  $15\text{km} \pm 28.3$  vs. PC 17km  $17\text{km} \pm 34.9$   $p = 0.0008$ ). Prehospital care was significantly more  
 220 common among patients transported by motorcycle taxi than by automobile taxis (31% vs. 5%,  
 221  $p < 0.001$ ). Just 20% of individuals transported by ambulance had prehospital care. (Table 1)  
 222

223 Additionally, PC more frequently presented with penetrating injury mechanisms (70% vs. 52%  
 224  $p < 0.0001$ ), including gunshot or stab wounds and both superficial and deep lacerations. PC  
 225 recipients had increased severity of injury by highest estimated abbreviated injury score (PC  
 226  $3.2 \pm 0.88$  vs. NPC  $2.7 \pm 0.80$ ) ( $p < 0.0001$ ). (Table 1)  
 227

228 *Clinical consequences of prehospital care*  
 229

230 Compared to NPC, the PC cohort presented with increased heart rate (NPC  $87\text{bpm} \pm 18.5$  vs. PC  
 231  $91\text{bpm} \pm 14.5$ ,  $p = 0.0001$ ) but reduced respiratory rate (NPC  $23 \pm 10.3$  vs. PC  $22 \pm 4.4$ ,  $p = 0.0004$ ) and  
 232 systolic blood pressure (NPC  $127\text{mmHg} \pm 23.8$  vs. PC  $123\text{mmHg} \pm 20.6$ ,  $p = 0.0001$ ). Prehospital care  
 233 recipients had increased rates of external bleeding (93% vs. 75%,  $p < 0.0001$ ), increased rates of  
 234 abnormal breath sounds (4% vs. 1%  $p = 0.001$ ), and more abnormalities on primary survey overall  
 235 (93% vs. 79%,  $p < 0.0001$ ). Despite this, the PC cohort had significantly increased rates of palpable  
 236 pulse on presentation ( $99.8$  vs.  $98.6$   $p = 0.042$ ). With respect to disposition, PC recipients less  
 237 frequently had a GCS  $< 9$  on primary survey (3% vs. 7%,  $p = 0.003$ ). (Table 3) Ultimately, multivariate  
 238 logistic regression adjusted for injury severity identified PC cohort to be associated with increased  
 239 injury survival. (OR 0.14,  $p < 0.0001$ )  
 240

|                  |               | NPC         |          | PC          |          | P        |
|------------------|---------------|-------------|----------|-------------|----------|----------|
|                  |               | Mean        |          | Mean        |          |          |
| <b>Vitals</b>    | SBP*          | 128         |          | 120         |          | $< 0.01$ |
|                  | HR**          | 87          |          | 91          |          | $< 0.01$ |
|                  | RR***         | 20          |          | 22          |          | $< 0.01$ |
|                  | Temp          | 36.9        |          | 36.8        |          | 0.13     |
|                  |               | <b>Freq</b> | <b>%</b> | <b>Freq</b> | <b>%</b> |          |
| <b>Airway</b>    | Not patent    | 31          | 2        | 4           | 1        | 0.16     |
|                  | Yes patent    | 1659        | 98       | 448         | 99       |          |
| <b>Breathing</b> | No chest rise | 17          | 1        | 1           | 0        | 0.27     |

|                    |                        |      |      |     |     |                 |
|--------------------|------------------------|------|------|-----|-----|-----------------|
|                    | Abnormal chest rise    | 1644 | 98   | 443 | 96  |                 |
|                    | Normal chest rise      | 30   | 1    | 8   | 4   |                 |
|                    | Abnormal breath sounds | 28   | 98   | 19  | 96  | <i>&lt;0.01</i> |
|                    | Normal breath sounds   | 1664 | 2    | 450 | 4   |                 |
| <b>Circulation</b> | No palpable pulse      | 23   | 1    | 1   | 0   | <i>0.04</i>     |
|                    | Yes palpable pulse     | 1669 | 99   | 449 | 100 |                 |
|                    | No external bleeding   | 408  | 24   | 30  | 7   | <i>&lt;0.01</i> |
|                    | Yes external bleeding  | 1274 | 76   | 419 | 93  |                 |
| <b>GCS</b>         | ≤9                     | 120  | 7.06 | 15  | 3   |                 |
|                    | >9                     | 1579 | 93   | 440 | 97  |                 |
|                    |                        |      |      |     |     | <i>&lt;0.01</i> |
| <b>Overall</b>     | No abnormalities       | 363  | 21   | 34  | 7   |                 |
|                    | Yes abnormalities      | 1336 | 79   | 421 | 93  |                 |

Table 3: Clinical consequences of prehospital care

\* systolic blood pressure; \*\* heart rate; \*\*\* respiratory rate

241  
242  
243  
244  
245  
246  
247  
248  
249  
250  
251  
252  
253  
254  
255  
256  
257  
258  
259  
260  
261  
262  
263  
264  
265  
266  
267  
268  
269

## DISCUSSION

In this study we characterized existing patterns and gaps in prehospital care in Cameroon to support development of a tailored trainee LFR curriculum. Prehospital care is relatively uncommon and is currently provided mostly by untrained bystanders at the scene. The provision of prehospital care is higher among patient with severe injuries, with recipients of prehospital care less likely to die upon presentation than non-recipients. The efficacy of prehospital intervention, even in the absence of formal training, further justifies the need for investment and development of sustainable prehospital infrastructure in Cameroon.

To maximize access to prehospital care, LFR trainees must have high exposure to injuries as they arise. Considering that road traffic injuries constitute nearly three quarters of patients in our cohort, and commercial vehicles transport over half of injured patients, our findings suggest taxi and mototaxi drivers may be an ideal target trainee population in this setting. Mototaxi drivers have been trained as first responders elsewhere in sub-Saharan Africa, including Uganda, Chad, Nigeria, and Sierra Leone, with associated evidence of increase in access to prehospital care. Because the cultural landscape across sub-Saharan Africa varies so greatly and buy-in from commercial drivers is critical to the sustainability of the intervention, a 360-degree acceptability assessment is indicated to assess appropriateness of commercial drivers as LFR trainees in Cameroon.

The most common care provided by untrained responders was general bleeding control and those with active bleeding received more prehospital intervention, but tourniquet placement was far less common. Rapid hemorrhage control using tourniquets for compressible extremity hemorrhage in patients not yet in shock is strongly associated with reduced mortality. Hemorrhage management is an accessible and high-impact intervention that should be emphasized in the curricula for layperson



270 first responder programs.<sup>13</sup> Using the same CTR dataset, our group previously demonstrated high  
271 rates of preventable deaths from hemorrhagic shock, which presents an addressable problem that  
272 informs curriculum development during future LFR trainings to reduce overall trauma mortality. In  
273 the absence of cardiac chain of survival infrastructure in Cameroon, CPR is low-yield for mortality  
274 benefits and will not be included in trainings.<sup>14</sup>

275  
276 Periodic review of clinical data from the CTR will remain critical to collaborating with local  
277 stakeholders for prehospital process planning. We plan on using the data to track rates of  
278 prehospital care, evaluate clinical outcomes, and analyze patterns of care among high-impact  
279 responders with future program implementation. The next step in our evaluation of the prehospital  
280 landscape will include qualitative analysis of the current system through stakeholder interviews to  
281 best assess the acceptability of potential prehospital interventions.

## 282 283 LIMITATIONS

284  
285 This study has several notable limitations. Due to the observational study design, we cannot infer  
286 causality in the relationship between prehospital care and clinical outcomes. Prehospital data  
287 collection for the trauma registry is completed by a registrar in the hospital, so some details about  
288 prehospital care in critically injured patients, including prehospital deaths, may be unknown.

## 289 290 CONCLUSIONS

291  
292 In Cameroon, prehospital care is provided by untrained bystanders to injury, but appears to generate  
293 improved clinical outcomes including reduced emergency department mortality. Commercial drivers  
294 provide most transport from the prehospital scene of injury to definitive care and have highest  
295 exposure to injury. Given the high rates of external bleeding among injury victims and the potential  
296 for impact with appropriate hemorrhage control, hemorrhage management will form a cornerstone  
297 of future LFR curricula. LFR program co-implementation in Cameroon with an existing trauma  
298 registry will permit ongoing quality improvement analyses for training not feasible in locations  
299 without access to a similar registry.

## 300 301 302 ACKNOWLEDGEMENTS:

303  
304 Alain Chichom-Mefire and S. Ariane Christie are joint senior authors.

305 References:

- 306 1. World Health Organization. Injuries and Violence: The Facts. 2010.
- 307 2. Bakalos G, Mamali M, Komninos C, et al. Advanced life support versus basic life support in  
308 the pre-hospital setting: A meta-analysis. *Resuscitation*. 2011;82(9):1130-1137.  
309 doi:10.1016/j.resuscitation.2011.04.006
- 310 3. Global Acute Care Advocacy Authors. The World Health Assembly resolution on integrated  
311 emergency, critical, and operative care for universal health coverage and protection from health  
312 emergencies: a golden opportunity to attenuate the global burden of acute and critical illness.  
313 *Intensive Care Med*. 2023 Oct;49(10):1223-1225. doi: 10.1007/s00134-023-07176-8
- 314 4. Jin J, Salesi Ao, Yip C-H, et al. Effectiveness of Quality Improvement Processes,  
315 Interventions, and Structure in Trauma Systems in Low- and Middle-Income Countries: A  
316 Systematic Review and Meta-analysis. *World Journal of Surgery*. 2021;45(7)doi:10.1007/s00268-021-  
317 06065-9
- 318 5. Thind A, Zakariah A, Mock C, Romero E, Hicks JM, Hsia R. Pre-Hospital and Emergency  
319 Care. In: Debas H, Donkor P, Gawande A, Jamison D, Kruk M, Mock C, eds. *Disease Control*  
320 *Priorities*. 3 ed. World Bank; 2015. *Essential Surgery*.
- 321 6. Chichom-Mefire A, Mbarga-Essim NT, Monono ME, Ngowe MN. Compliance of district  
322 hospitals in the Center Region of Cameroon with WHO/IATSIIC guidelines for the care of the  
323 injured: a cross-sectional analysis. *World Journal of Surgery*. 2014;38(10)doi:10.1007/s00268-014-2609-9
- 324 7. Lukumay GG, Ndile ML, Outwater AH, et al. Provision of post-crash first aid by traffic  
325 police in Dar es Salaam, Tanzania: a cross-sectional survey. *BMC Emergency Medicine*.  
326 2018;18(1)doi:10.1186/s12873-018-0199-9
- 327 8. Delaney PG, Eisner ZJ, Thullah AH, et al. Evaluating a Novel Prehospital Emergency  
328 Trauma Care Assessment Tool (PETCAT) for Low- and Middle-Income Countries in Sierra Leone.  
329 *World Journal of Surgery*. 2021;45doi:10.1007/s00268-021-06140-1
- 330 9. Hancock CJ, Delaney PG, Eisner ZJ, et al. Developing a Law First Responder Program in  
331 Chad: A 12-Month Follow-Up Evaluation of Rural Prehospital Emergency Care Program. *Prehospital*  
332 *and Disaster Medicine*. 2020;35(5)doi:10.1017/S1049023X20000977
- 333 10. Eisner ZJ, Delaney PG, Thullah AH, et al. Evaluation of a Lay First Responder Program in  
334 Sierra Leone as a Scalable Model for Prehospital Trauma Care. *Injury*.  
335 2020;51doi:10.1016/j.injury.2020.09.001
- 336 11. Delaney PG, Eisner ZJ, Blackwell S, et al. Exploring the factors motivating continued Lay  
337 First Responder participation in Uganda: a mixed-methods, 3-year follow-up. *Emergency Medicine*  
338 *Journal*. 2020;38doi:10.1136/emered-2020-210076
- 339 12. Juillard CJ, Stevens KA, Monono ME, et al. Analysis of Prospective Trauma Registry Data in  
340 Francophone Africa: A Pilot Study from Cameroon. *World Journal of Surgery*. 2014;38:2534-2542.  
341 doi:10.1007/s00268-014-2604-1
- 342 13. Kragh Jr JF, Walters TJ, Baer DG, et al. Survival with emergency tourniquet use to stop  
343 bleeding in major limb trauma. *Annals of Surgery*. 2009;249(1)doi:10.1097/SLA.0b013e31818842ba
- 344 14. Christie SA, Zheng D, Dissak-Delon, et al. How trauma patients die in low resource settings:  
345 Identifying early targets for trauma quality improvement. *Journal of Trauma and Acute Care Surgery*.  
346 2023;94(2):288-294. doi:10.1097/TA.0000000000003768
- 347
